# Supplementary material
Source: Research Square preprint supplement (doi:10.21203/rs.3.rs-10014166/v1)
Supplement: Supplementary file 1 [file 415b490ca8c0d93571a40192.docx]

**Appendix 1**. Research instrument

**Virtual customer experience** (Salem & Alanadoly, 2024)

CON1 I can request information about the company’s products through multiple communication channels.

CON2 I can also check product availability across these channels.

CON3 My account access is connected across the company’s channels.

INT1 My interactions with customer service across the company’s platforms are integrated.

INT2 The company coordinates and links my activities across its social media platforms.

INT3 The company offers various product options through multiple social media channels.

INT4 New product launches are coordinated across channels.

INT5 Promotional activities are aligned across different media.

CCY2 The company also consistently responds to customers.

CCY3 Product quality remains consistent.

CCY4 Service performance is consistently maintained.

FLE1 Customers can place online orders or purchase products in person at the store.

FLE2 Customers can choose among different channels to obtain the products they want.

FLE3 After-sales service is available through multiple channels.

PER1 The company provides me with product recommendations.

PER2 The company notifies me when discounts are available.

PER3 I receive updates when the company plans to offer gifts to customers.

PER4 The company presents product offers that align with my interests.

**Customer Engagement** (Salem & Alanadoly, 2024)

ENP1 I frequently visit the company’s social media channels.

ENP2 I enjoy spending substantial time engaging with the company’s social media content.

SOC1 I find the company’s online application easy and enjoyable to use.

COA1 I want to learn more about the company.

COA2 Information related to the company’s products consistently captures my attention.

**Online customer participation** (Taheri et al., 2017)

CPN1 I take time to share my expectations online.

CPN3 I engage in initiatives aimed at improving service quality.

CPN4 I encourage the company to deliver higher-quality products.

CPN5 I also provide feedback to staff to support service delivery improvements.

**Appendix 2**. Assessment of marker variables

| **Control Variables** | | **Correlation (*p*-value)** | | | | | | | | | | |
| --- | --- | --- | --- | --- | --- | --- | --- | --- | --- | --- | --- | --- |
| **CON** | **INT** | **CCY** | **FLE** | **PER** | **ENP** | **SOC** | **COA** | **CPN** | **ATB** | **FCS** |
| -none-a | CON | 1 |  |  |  |  |  |  |  |  |  |  |
| INT | .87 (.00) | 1 |  |  |  |  |  |  |  |  |  |
| CCY | .78 (.00) | .83 (.00) | 1 |  |  |  |  |  |  |  |  |
| FLE | .77 (.00) | .85 (.00) | .87 (.00) | 1 |  |  |  |  |  |  |  |
| PER | .77 (.00) | .81 (.00) | .85 (.00) | .83 (.00) | 1 |  |  |  |  |  |  |
| ENP | .40 (.00) | .43 (.00) | .41 (.00) | .37 (.00) | .42 (.00) | 1 |  |  |  |  |  |
| SOC | .40 (.00) | .41 (.00) | .38 (.00) | .36 (.00) | .44 (.00) | .61 (.00) | 1 |  |  |  |  |
| COA | .39 (.00) | .42 (.00) | .43 (.00) | .37 (.00) | .42 (.00) | .63 (.00) | .52 (.00) | 1 |  |  |  |
| CPN | .41 (.00) | .44 (.00) | .36 (.00) | .38 (.00) | .41 (.00) | .61 (.00) | .51 (.00) | .58 (.00) | 1 |  |  |
| ATB | .34 (.00) | .39 (.00) | .37 (.00) | .38 (.00) | .35 (.00) | .35 (.00) | .41 (.00) | .42 (.00) | .35 (.00) | 1 |  |
| FCS | .21 (.00) | .24 (.00) | .15 (.00) | .17 (.00) | .20 (.00) | .43 (.00) | .38 (.00) | .37 (.00) | .61 (.00) | .16 (.00) | 1 |
| ATB and FCS | CON | 1 |  |  |  |  |  |  |  |  |  |  |
| INT | .85 (.00) | 1 |  |  |  |  |  |  |  |  |  |
| CCY | .75 (.00) | .80 (.00) | 1 |  |  |  |  |  |  |  |  |
| FLE | .74 (.00) | .82 (.00) | .85 (.00) | 1 |  |  |  |  |  |  |  |
| PER | .73 (.00) | .77 (.00) | .83 (.00) | .80 (.00) | 1 |  |  |  |  |  |  |
| ENP | .29 (.00) | .29 (.00) | .31 (.00) | .25 (.00) | .31 (.00) | 1 |  |  |  |  |  |
| SOC | .27 (.00) | .26 (.00) | .26 (.00) | .21 (.00) | .32 (.00) | .48 (.00) | 1 |  |  |  |  |
| COA | .26 (.00) | .27 (.00) | .31 (.00) | .23 (.00) | .29 (.00) | .51 (.00) | .35 (.00) | 1 |  |  |  |
| CPN | .30 (.00) | .31 (.00) | .25 (.00) | .27 (.00) | .30 (.00) | .43 (.00) | .30 (.00) | .40 (.00) | 1 |  |  |

Notes: *r* = correlation coefficient, a = cells containing zero-order (Pearson) correlations

**Appendix 3**. Mardia’s test

| **Univariate Skewness and Kurtosis** | | | | | | |
| --- | --- | --- | --- | --- | --- | --- |
| **Variable** | **Skewness** | **SE_skew** | **Z_skew** | **Kurtosis** | **SE_kurt** | **Z_kurt** |
| CON1 | -.45 | .11 | -4.03 | -.15 | .23 | -.67 |
| CON2 | -.72 |  | -6.41 | .60 |  | 2.65 |
| CON3 | -.68 |  | -6.03 | .42 |  | 1.88 |
| INT1 | -.59 |  | -5.24 | .16 |  | .72 |
| INT2 | -.57 |  | -5.09 | .24 |  | 1.09 |
| INT3 | -.73 |  | -6.50 | .52 |  | 2.31 |
| INT4 | -.57 |  | -5.07 | -.06 |  | -.25 |
| INT5 | -.42 |  | -3.77 | -.36 |  | -1.59 |
| CCY1 | -.75 |  | -6.67 | .77 |  | 3.44 |
| CCY2 | -.73 |  | -6.45 | .68 |  | 3.04 |
| CCY3 | -.54 |  | -4.78 | 1.10 |  | 4.88 |
| CCY4 | -.58 |  | -5.19 | .04 |  | .15 |
| FLE1 | -.74 |  | -6.61 | 1.02 |  | 4.54 |
| FLE2 | -.65 |  | -5.80 | .27 |  | 1.19 |
| FLE3 | -.60 |  | -5.32 | .27 |  | 1.22 |
| PER1 | -.71 |  | -6.28 | .70 |  | 3.13 |
| PER2 | -.66 |  | -5.80 | 1.23 |  | 5.48 |
| PER3 | -.85 |  | -7.59 | 1.01 |  | 4.50 |
| PER4 | -.87 |  | -7.70 | .85 |  | 3.79 |
| ENP1 | -.46 |  | -4.06 | .46 |  | 2.06 |
| ENP2 | -.76 |  | -6.73 | .50 |  | 2.23 |
| SOC1 | -.59 |  | -5.25 | .35 |  | 1.56 |
| SOC2 | -.74 |  | -6.61 | .80 |  | 3.56 |
| COA1 | -.55 |  | -4.86 | .04 |  | .17 |
| COA2 | -.82 |  | -7.28 | 1.39 |  | 6.17 |
| CPN1 | -.52 |  | -4.64 | .15 |  | .67 |
| CPN2 | -.75 |  | -6.70 | .06 |  | .28 |
| CPN3 | -.56 |  | -4.98 | -.16 |  | -.72 |
| CPN4 | -.54 |  | -4.75 | -.26 |  | -1.17 |
| CPN5 | -.70 |  | -6.22 | .41 |  | 1.81 |
| **Mardia’s multivariate skewness and kurtosis** | | | | | | |
|  | *β* | z | *p*-value |  |  |  |
| Skewness | 242.84 | 19030.60 | .00 |  |  |  |
| Kurtosis | 1425.66 | 115.42 | .00 |  |  |  |
